# Supplementary material for: Sex differences in major cardiovascular outcomes and fractures in patients with subclinical thyroid dysfunction: a systematic review and meta-analysis
Source: publisher site journal article supplement (doi:10.18632/aging.204352), 2022-10-25
Supplement: Supplementary file [file aging-v14i20-204352-supplementary-material-SD2.pdf]

## SUPPLEMENTARY TABLE

**Supplementary Table 1. Quality scores of prospective cohort studies using Newcastle-Ottawa scale.**

| Study                             | Selection                                |                                     |                                                  | Comparability                                                 |                                                      | Outcome               |                             | NOS                     |               |
|-----------------------------------|------------------------------------------|-------------------------------------|--------------------------------------------------|---------------------------------------------------------------|------------------------------------------------------|-----------------------|-----------------------------|-------------------------|---------------|
|                                   | Representativeness of the exposed cohort | Selection of the non exposed cohort | Ascertainment of subclinical thyroid dysfunction | Demonstration that outcomes was not present at start of study | Comparability on the basis of the design or analysis | Assessment of outcome | Adequate follow-up duration | Adequate follow-up rate | Overall score |
| Rotterdam 2000 [16]               | *                                        | *                                   | *                                                | *                                                             | **                                                   | *                     | —                           | *                       | *****         |
| SOF 2001 [17]                     | *                                        | *                                   | *                                                | *                                                             | **                                                   | *                     | —                           | *                       | *****         |
| Birmingham 2001 [18]              | *                                        | *                                   | *                                                | *                                                             | *                                                    | *                     | —                           | *                       | *****         |
| RERF 2004 [19]                    | *                                        | *                                   | *                                                | *                                                             | *                                                    | *                     | *                           | *                       | *****         |
| Sheffield 2008 [20]               | -                                        | *                                   | *                                                | *                                                             | **                                                   | *                     | *                           | *                       | *****         |
| CHS 2010 [21]                     | *                                        | *                                   | *                                                | *                                                             | **                                                   | *                     | *                           | *                       | *****         |
| OPUS 2010 [22]                    | *                                        | *                                   | *                                                | *                                                             | *                                                    | *                     | -                           | *                       | *****         |
| PROSPER 2012 [23]                 | *                                        | *                                   | *                                                | *                                                             | **                                                   | *                     | -                           | *                       | *****         |
| DNPR 2012 [24]                    | *                                        | *                                   | *                                                | *                                                             | *                                                    | *                     | -                           | *                       | *****         |
| MrOS-US 2013 [25]                 | *                                        | *                                   | *                                                | *                                                             | **                                                   | *                     | *                           | *                       | *****         |
| HUNT 2013 [26]                    | *                                        | *                                   | *                                                | *                                                             | *                                                    | *                     | *                           | *                       | *****         |
| WHI-OS 2013 [27]                  | *                                        | *                                   | *                                                | *                                                             | **                                                   | *                     | -                           | *                       | *****         |
| OPENTHYRO 2014 [28]               | *                                        | *                                   | *                                                | *                                                             | **                                                   | *                     | -                           | *                       | *****         |
| Ansung cohort study 2014 [29]     | *                                        | *                                   | *                                                | *                                                             | *                                                    | *                     | *                           | *                       | *****         |
| General Hospital Vienna 2015 [30] | *                                        | *                                   | *                                                | *                                                             | *                                                    | *                     | —                           | *                       | *****         |
| LDO 2015 [31]                     | *                                        | *                                   | *                                                | *                                                             | **                                                   | *                     | —                           | *                       | *****         |
| USRT 2017 [32]                    | *                                        | *                                   | *                                                | *                                                             | **                                                   | *                     | *                           | *                       | *****         |
| HIMS 2018 [33]                    | *                                        | *                                   | *                                                | *                                                             | **                                                   | *                     | —                           | *                       | *****         |
| US veterans 2018 [34]             | *                                        | *                                   | *                                                | *                                                             | **                                                   | *                     | —                           | *                       | *****         |
| Taiwan NHI 2018 [35]              | *                                        | *                                   | *                                                | *                                                             | **                                                   | *                     | —                           | *                       | *****         |
| THIN 2019 [36]                    | *                                        | *                                   | *                                                | *                                                             | *                                                    | *                     | —                           | *                       | *****         |
| NHANES 2020 [37]                  | *                                        | *                                   | *                                                | *                                                             | **                                                   | *                     | —                           | *                       | *****         |
| Korean NHI 2020 [38]              | *                                        | *                                   | *                                                | *                                                             | *                                                    | *                     | *                           | *                       | *****         |
| MrOS-Sweden 2021 [39]             | *                                        | *                                   | *                                                | *                                                             | **                                                   | *                     | —                           | *                       | *****         |
